# Supplementary material for: Marine heatwaves and the collapse of marginal North Atlantic kelp forests
Source: PubMed Central journal article supplement (PMC7414212; doi:10.1038/s41598-020-70273-x), 2020-08-07
Supplement: 41598_2020_70273_MOESM1_ESM.pdf [file 41598_2020_70273_MOESM1_ESM.pdf]

## Marine heatwaves and the collapse of marginal North Atlantic kelp forests

Filbee-Dexter K, Wernberg T, Grace SP, Thormar J, Fredriksen S, Narvaez CN, Feehan CJ, Norderhaug KM

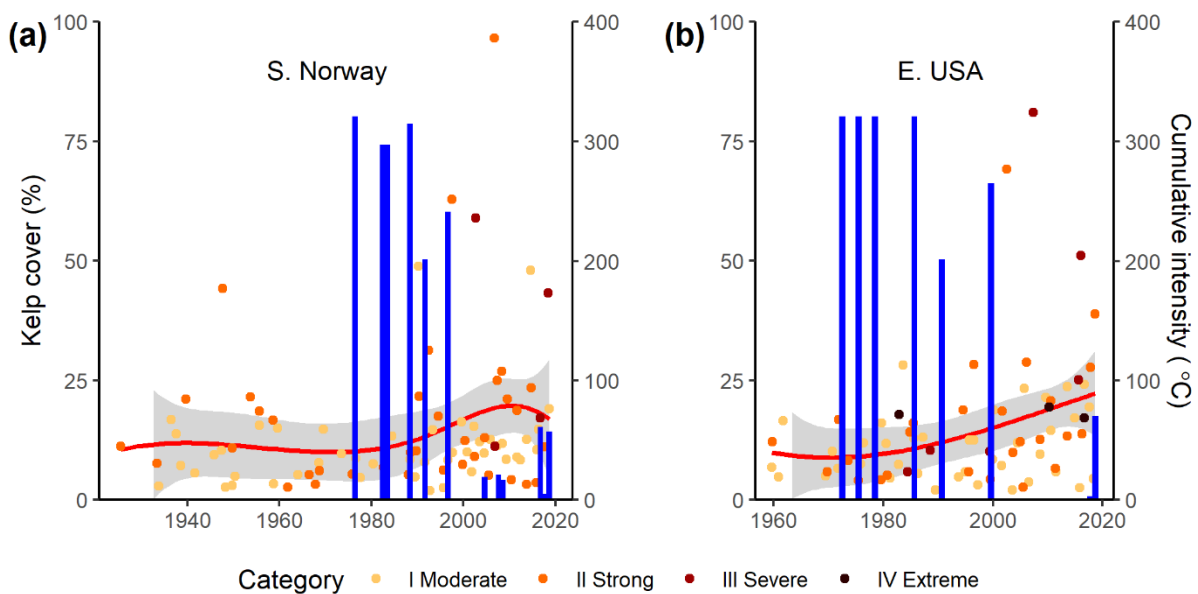

**Figure S1.** Historic kelp cover (blue bars) and cumulative annual intensity (°C days) of MHWs (points) for southern Norway (a) and the eastern USA (b). Colours indicate strongest category of MHW intensity each year (based on size of °C anomaly relative to the climatological mean). The cumulative heatwave intensity in each year (secondary axis) is the integral of the °C increase over baseline conditions for the duration of the events. Trendlines are fitted using a generalized additive model with thin plate regression spline smoothers (formula:  $y \sim s(x, 4)$ ). Temperature data are from subsurface loggers. Of the 152 individual MHW events detected in the temperature record from southern Norway, the only severe (category III) MHWs occurred in 2002, 2016, and 2018. In the eastern USA, of the 169 individual MHW events detected over the last 60 years (1959 – 2018), severe MHWs occurred in 1984, 1988, 1999, 2007, 2015, and 2016, and extreme (category IV) MHWs in 1982, 2010, and 2016. Kelp cover data and errors are reported in Table S2.

**Table S1.** Average kelp cover (August in Norway and June in E USA), mortality, growth and erosion rates at study sites during 2018 MHWs. Transplant mortality is for arrays at recipient site with source site noted in brackets. Natural mortality is for tagged, unmanipulated plants at Norway sites. \*\* denotes kelps from sites that exceeded mortality thresholds by 0.5 °C.

| Site name           | Transplant type | Position latitude, longitude | Kelp cover % (SD) | Transplant mortality % [source site] | Natural mortality % | Growth mm d <sup>-1</sup> (SD) | Erosion mm d <sup>-1</sup> (SD) | Temperature logger            |
|---------------------|-----------------|------------------------------|-------------------|--------------------------------------|---------------------|--------------------------------|---------------------------------|-------------------------------|
| <b>S. Norway</b>    |                 |                              |                   |                                      |                     |                                |                                 |                               |
| SA2                 |                 | 58.279 °N, 8.532 °E          | 5.3 (11.3)        | -                                    | 5                   | 0.17 (0.21)                    | 3.20 (0.36)                     | subsurface float              |
| SA4                 | Recipient       | 58.312 °N, 8.575 °E          | 4.6 (5.9)         | 44 [S3]<br>75 [S8]**                 | 10                  | 0.96 (2.33)                    | 1.31 (0.36)                     | subsurface float              |
| S3                  | Source          | 58.397 °N, 8.743 °E          | 55.2 (38.0)       | 31 [S3]                              | 35                  | 0.38 (0.26)                    | 0.63 (0.26)                     | subsurface float              |
| S17                 | Recipient       | 58.421 °N, 8.772 °E          | 19.2 (20.4)       | -                                    | 0                   | 0.22 (0.18)                    | 5.01 (0.47)                     | lost                          |
| S7                  |                 | 58.521 °N, 8.931 °E          | 21.3 (18.9)       | -                                    | 45                  | 0.01 (0.00)                    | 2.75 (0.41)                     | subsurface float              |
| S8                  | Source          | 58.512 °N, 8.937 °E          | 36.8 (30.8)       | 70 [S8]**                            | 80**                | 0.05 (0.07)                    | 0.88 (0.26)                     | subsurface float              |
| S5                  | Recipient       | 58.505 °N, 8.895 °E          | 0.5 (2.3)         | 38 [S3]<br>94 [S8]**                 | 42.5                | 0.22 (0.06)                    | 5.71 (0.14)                     | subsurface float              |
| S13                 |                 | 58.423 °N, 8.757 °E          | 19.2 (20.4)       | 37 [S3]<br>76 [S8]**                 | 25                  | 0.20 (0.01)                    | 3.34 (0.34)                     | subsurface float              |
| HB7                 |                 | 58.254 °N, 8.523 °E          | 73.7 (25.9)       | -                                    | 20                  | 0.96 (0.22)                    | 1.31 (0.36)                     | subsurface float              |
| <b>E. USA</b>       |                 |                              |                   |                                      |                     |                                |                                 |                               |
| King's Beach        | Recipient       | 41.453 °N, 71.343 °W         | 0 <sup>3</sup>    | 58 [FW]**                            | no kelp             | 0.48 (0.48) <sup>1</sup>       | 4.90 (3.33) <sup>1</sup>        | estimated by SST <sup>2</sup> |
| Fort Wetherill (FW) | Source          | 41.478 °N, 71.362 °W         | 34.5 (35.2)       | 75 [FW]                              | ND                  | 0.10 (0.00) <sup>1</sup>       | 3.81 (1.02) <sup>1</sup>        | anchored to seafloor          |
| Old Kelsey Point    | Recipient       | 41.273 °N, 72.424 °W         | 0 <sup>3</sup>    | 100 [FW]**                           | no kelp             | 0                              | NA                              | anchored to seafloor          |

<sup>1</sup>Measured on transplanted kelps. <sup>2</sup>Estimated using temperature data from the nearby FW logger, adjusted by +0.2 °C, which is the difference between average SST records between sites. <sup>3</sup>Based on no kelp observed at the site during transplantation experiment. ND = no data. NA = not applicable

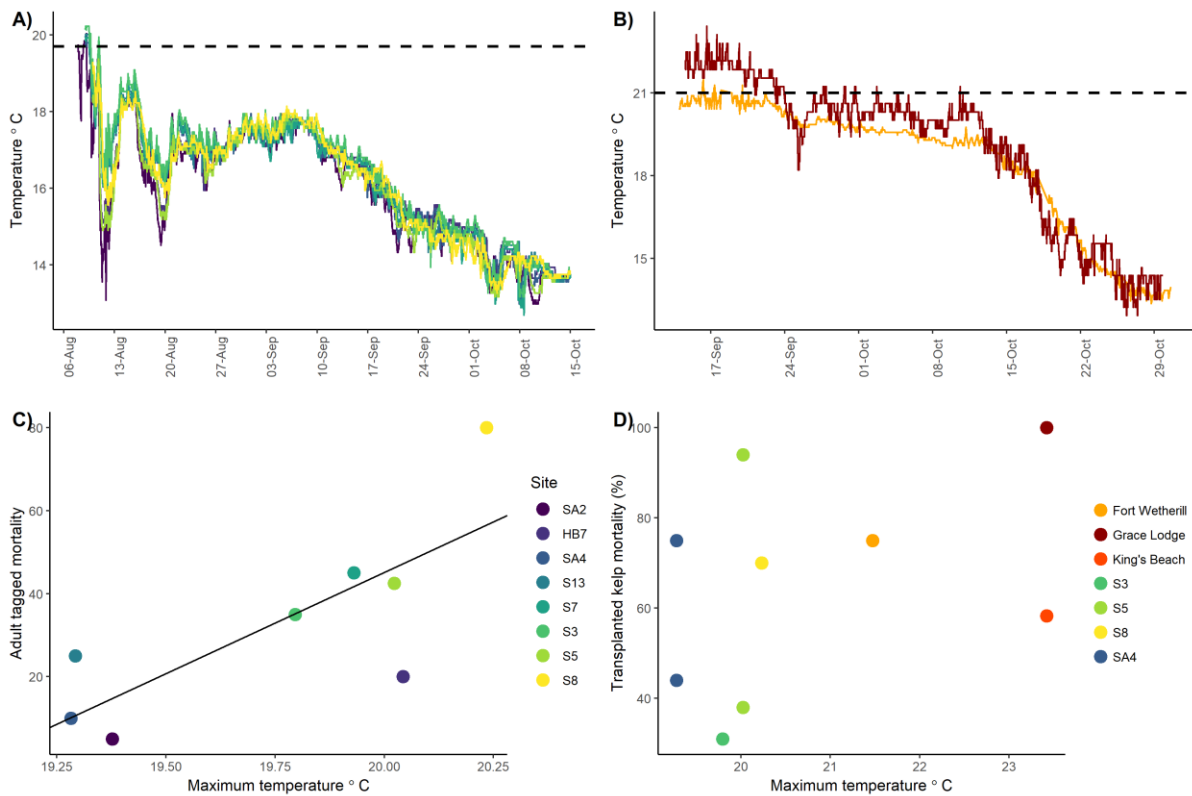

**Figure S2.** Water temperature measured from subsurface loggers over the duration of the experiments at all study sites in southern Norway (A) and the eastern USA (B). Threshold temperatures for *Saccharina latissima* mortality in each region are shown by dashed lines. Percent mortality in relation to maximum temperatures of tagged kelps at sites in Norway (C) and for all kelps on transplant arrays (including controls) in southern Norway and the eastern USA (D). Additional details are in Table S1.

**Table S2.** Historic records of kelp abundance for study areas in southern Norway and eastern USA. Site IDs are from original study (with corresponding site ID for this study in brackets). Anecdotal accounts of kelp forests in Narragansett Bay are included to establish historic presence of kelp.

| Site                             | Year | Site IDs<br>(this study)         | Kelp<br>cover<br>(%) | SD              | Source                     | GPS<br>(Lat, Lon) |
|----------------------------------|------|----------------------------------|----------------------|-----------------|----------------------------|-------------------|
| Southern Norway                  |      |                                  |                      |                 |                            |                   |
| Kristiansand                     | 1976 | 5-03 (SA2) <sup>1</sup>          | 80                   | ND <sup>2</sup> | (Åsen 2006)                | 58.148, 8.041     |
| Kristiansand                     | 1982 | 5-03, 5-04<br>(SA2) <sup>1</sup> | 82.5                 | 10.6            | (Åsen 2006)                | 58.115, 8.065     |
| Kristiansand                     | 1983 | 5-03, 5-04<br>(SA2) <sup>1</sup> | 82.5                 | 10.6            | (Åsen 2006)                | 58.148, 8.041     |
| Ærøy                             | 1988 | 4B                               | 78.4                 | 3.9             | (Berge et al. 1988)        | 58.416, 8.779     |
| Eydehavn                         | 1991 | 4-22 (S6, S7)                    | 50                   |                 | (Pedersen et al. 1993)     | 58.511, 8.909     |
| Flødevigen                       | 1996 | 4-8 (S13)                        | 60                   | ND              | (Christie 1997)            | 58.729, 9.287     |
| Flødevigen/-<br>Eydehavn         | 2004 | 4-22, 4-08<br>(S13, S6, S7)      | 4.5                  | 0.71            | (Moy and Christie<br>2012) | 58.510, 8.909     |
| Eydehavn                         | 2007 | 4-22, (S6, S7)                   | 5                    | 0               | (Moy and Christie<br>2012) | 58.510, 8.909     |
| Flødevigen                       | 2008 | 4-08 (S13)                       | 4                    | 0               | (Moy and Christie<br>2012) | 58.729, 9.287     |
| Grimstad                         | 2016 | SA2, SA4                         | 15.0                 | 14.0            | (Torp 2018)                | 58.279, 8.532     |
| Grimstad                         | 2017 | SA2, SA4                         | 0                    | 0               | (Torp 2018)                | 58.279, 8.532     |
| Flødevigen/<br>Eydehavn/Grimstad | 2018 | S7, S13,<br>SA2, SA4             | 12.6                 | 8.8             | This study                 | 58.728, 09.287    |
| Eastern USA                      |      |                                  |                      |                 |                            |                   |
| Narragansett Bay                 | 1972 | FW                               | ~80                  | ND <sup>3</sup> | Wes Pratt, pers. comm.     | 41.478, -71.362   |
| Narragansett Bay                 | 1975 | FW                               | ~80                  | ND <sup>3</sup> | Wes Pratt, pers. comm.     | 41.478, -71.362   |
| Narragansett Bay                 | 1978 | FW                               | ~80                  | ND <sup>3</sup> | Wes Pratt, pers. comm.     | 41.478, -71.362   |
| Narragansett Bay                 | 1985 | FW                               | ~80                  | ND <sup>3</sup> | Sean Grace pers. obs.      | 41.478, -71.362   |
| Narragansett Bay                 | 1990 | FW                               | >50                  | ND <sup>2</sup> | (Harlin and Rines<br>1993) | 41.478, -71.362   |
| Narragansett Bay                 | 1999 | FW                               | 66                   | 12              | (Grace 2004)               | 41.478, -71.362   |
| Narragansett Bay                 | 2017 | FW                               | 0.5                  | 1.6             | This study                 | 41.478, -71.362   |
| Narragansett Bay                 | 2018 | FW                               | 17.3                 | 15.1            | This study                 | 41.478, -71.362   |

<sup>1</sup>20 km W of SA2. <sup>2</sup>Errors not reported in study. <sup>3</sup>Personal observations of researchers from the area.
